# Supplementary material for: Short-Term Biochemical Biomarkers of Stress in the Oyster Magallana angulata Exposed to Gymnodinium catenatum and Skeletonema marinoi
Source: MDPI journal article supplement (doi:10.3390/sci5030030), 2023-07-17
Supplement: s1 [file s1]

Archive with 1 entries (1 files):
- sci-2375567-supplementary.pdf
