# Supplementary material for: Short-Term Biochemical Biomarkers of Stress in the Oyster Magallana angulata Exposed to Gymnodinium catenatum and Skeletonema marinoi
Source: MDPI journal article supplement (doi:10.3390/sci5030030), 2023-07-17
Supplement: s1 [file s1 › sci-2375567-supplementary.pdf]

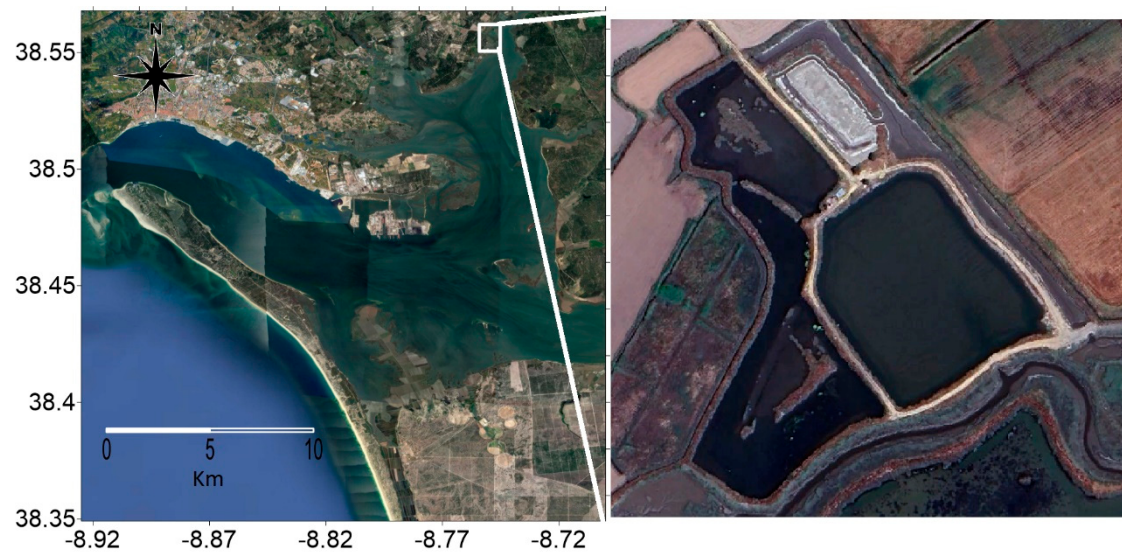

Figure S1 – Location of the aquaculture from which the oysters *Magallana angulata* were collected. This aquaculture is located at “Herdade da Gambia” in the Sado Estuary, Portugal.
